# Supplementary material
Source: publisher figshare collection journal article supplement (https://karger.figshare.com/ndownloader/files/33157145)
Supplement: Supplementary file 1 [file 33157145]

**Table S2 KEGG function enrichment of targeted DEmRNAs**

| **Term** | **Count** | **P value** | **Genes** |
| --- | --- | --- | --- |
| Vascular smooth muscle contraction | 11 | 4.53E-05 | KCNMA1, AGTR1, PLCB4, PPP1R12B, MYH11, AVPR1A, PLA2G2A, PPP1R12A, NPR1, MYLK, MYL9 |
| Focal adhesion | 14 | 9.69E-05 | CAV3, CAV2, CAV1, ACTN4, TNC, FLNC, COL4A6, MYL9, ITGA6, PAK3, ITGA7, PPP1R12A, PDGFD, MYLK |
| Regulation of actin cytoskeleton | 12 | 0.002415 | ACTN4, ITGA6, PAK3, CFL2, ITGA7, CYFIP2, PPP1R12A, FGF13, PDGFD, MYLK, MYH10, MYL9 |
| PPAR signaling pathway | 6 | 0.00977 | LPL, CD36, SORBS1, PLIN1, FABP3, ADIPOQ |
| Calcium signaling pathway | 9 | 0.018454 | AGTR1, PLCB4, P2RX1, ERBB3, CAMK2G, PLN, AVPR1A, RYR2, MYLK |
| Cell adhesion molecules (CAMs) | 7 | 0.01944 | MPZ, ITGA6, CD34, NFASC, ESAM, SELE, NEGR1 |
| Tyrosine metabolism | 4 | 0.023766 | MAOA, LCLAT1, ADH1B, AOC3 |
| Adherens junction | 5 | 0.028576 | SORBS1, ACTN4, TCF7L1, CTNNA3, ACVR1C |
| Phenylalanine metabolism | 3 | 0.034979 | MAOA, LCLAT1, AOC3 |
| beta-Alanine metabolism | 3 | 0.036979 | ALDH1B1, GAD1, AOC3 |
| Wnt signaling pathway | 7 | 0.042499 | PLCB4, SFRP1, CAMK2G, FZD3, SOX17, DAAM2, TCF7L1 |
| ECM-receptor interaction | 5 | 0.047654 | CD36, ITGA6, TNC, ITGA7, COL4A6 |
